# Supplementary material for: Patient navigation programs for people with dementia, their caregivers, and members of the care team: a scoping review
Source: PubMed Central journal article supplement — JBI Evid Synth. 2022 Nov 29;21(2):281–325. doi: 10.11124/JBIES-22-00024 (PMC10578521; doi:10.11124/jbies-22-00024), 2022-11-29
Supplement: srx-21-281-s001.pdf [file srx-21-281-s001.pdf]

## Supplemental digital content 1: Studies ineligible following full-text review

### Reason for exclusion: Did not discuss a patient navigation program (n = 93)

1. Agar M, Beattie E, Luckett T, Phillips J, Luscombe G, Goodall S, et al. Pragmatic cluster randomised controlled trial of facilitated family case conferencing compared with usual care for improving end of life care and outcomes in nursing home residents with advanced dementia and their families: the IDEAL study protocol. *BMC Palliat Care*. 2015 Dec;14(1):63.
2. Agar M, Luckett T, Luscombe G, Phillips J, Beattie E, Pond D, et al. Effects of facilitated family case conferencing for advanced dementia: a cluster randomised clinical trial. Quinn TJ, editor. *PLoS ONE*. 2017 Aug 7;12(8):e0181020.
3. A Guide to Dementia & Nursing Care: Senior Care in NB [Internet]. New Brunswick: New Brunswick dementia care decision guide; [cited 2021 Sep 14]. Available from: <https://nbdementiaguide.ca/>
4. Aldeen AZ, Courtney DM, Lindquist LA, Dresden SM, Gravenor SJ, the GEDI-WISE Investigators. Geriatric emergency department innovations: preliminary data for the geriatric nurse liaison model. *J Am Geriatr Soc*. 2014 Sep;62(9):1781–5.
5. Alder CA, Bynagari BBR, Boustani MA. A Population Health Approach to Dementia. Integrating evidence-based care with innovative technologies. *Healthc Exec*. 2017 Mar;32(2):62–4.
6. Alder CA, Austrom MG, LaMantia MA, Boustani MA. *Aging Brain Care* [Internet]. Feinstein RE, Connelly JV, Feinstein MS, editors. Vol. 1. Oxford University Press; 2017 [cited 2021 Sep 15]. Available from: <http://oxfordmedicine.com/view/10.1093/med/9780190276201.001.0001/med-9780190276201-chapter-8>
7. Austrom MG, Carvell CA, Alder CA, Gao S, Boustani M, LaMantia M. Workforce development to provide person-centered care. *Aging Ment Health*. 2016 Aug 2;20(8):781–92.
8. Austrom MG, Hartwell C, Moore P, Perkins AJ, Damush T, Unverzagt FW, et al. An integrated model of comprehensive care for people with Alzheimer’s disease and their caregivers in a primary care setting. *Dementia*. 2006 Aug;5(3):339–52.
9. Ayton D, O’Donnell R, Vicary D, Bateman C, Moran C, Srikanth VK, et al. Psychosocial volunteer support for older adults with cognitive impairment: development of MyCare Ageing using a codesign approach via action research. *BMJ Open*. 2020 Sep;10(9):e036449.
10. Bass DM, Judge KS, Snow AL, Wilson NL, Looman WJ, McCarthy C, et al. Negative caregiving effects among caregivers of veterans with dementia. *Am J of Geriatr Psychiatry*. 2012 Mar;20(3):239–47.
11. Britton B. Making a difference to the lives of people with dementia and their carers. *J Community Nurs*. 2014;28(3):10.
12. Callahan CM, Boustani MA, Weiner M, Beck RA, Livin LR, Kellams JJ, et al. Implementing dementia care models in primary care settings: the aging brain care medical home. *Aging Ment Health*. 2011 Jan;15(1):5–12.
13. Carpenter J, Miller SC, Kolanowski AM, Karel MJ, Periyakoil VS, Lowery J, et al. Partnership to enhance resident outcomes for community living center residents with dementia: description of the protocol and preliminary findings. *J Gerontol Nurs*. 2019 Mar;45(3):21–30.

Anthonisen G, Luke A, MacNeill L, MacNeill AL, Goudreau A, Doucet S. Patient navigation programs for people with dementia, their caregivers, and members of the care team: a scoping review. *JBI Evid Synth*. 2023;21(2). Supplemental Digital Content 1.

14. Chodosh J, Pearson ML, Connor KI, Vassar SD, Kaisey M, Lee ML, et al. A dementia care management intervention: which components improve quality. *Am J Manag Care*. 2012 Feb 1;18(2):85–94.
15. Connell C, Kole S, Benedict C, Holmes S, Gilman S, Beane E. Increasing coordination of the dementia service delivery network: planning for the community outreach education program. *Gerontologist*. 1994;34(5):700–6.
16. Coon DW, Williams MP, Moore RJ, Edgerly ES, Steinbach CM, Roth SP, et al. The northern California chronic care network for dementia. *J Am Soc Geriatr Dent*. 2004;52(1):150–6.
17. Cottingham AH, Alder C, Austrom MG, Johnson CS, Boustani MA, Litzelman DK. New workforce development in dementia care: screening for “caring”: preliminary data. *J Am Geriatr Soc*. 2014 Jul;62(7):1364–8.
18. Couture M, Ducharme F, Lamontagne J. The role of health care professionals in the decision-making process of family caregivers regarding placement of a cognitively impaired elderly relative. *Home Health Care Manag Pract*. 2012 Dec;24(6):283–91.
19. D’Souza MF, Davagnino J, Hastings SN, Sloane R, Kamholz B, Twersky J. Preliminary data from the Caring for Older Adults and Caregivers at Home (COACH) program: a care coordination program for home-based dementia care and caregiver support in a veterans affairs medical center. *J Am Geriatr Soc*. 2015 Jun;63(6):1203–8.
20. Darlak L, Bass DM, Judge KS, Wilson N, Looman W, McCarthy C, et al. Engagement of veterans with dementia: an evidence-based care coordination program in *Partners in Dementia Care: An Evidence-Based Care Coordination Program*. *J Appl Gerontol*. 2017 May;36(5):570–91.
21. Davies N, Hopwood J, Walker N, Ross J, Iliffe S, Walters K, et al. Designing and developing a co-produced theoretical and evidence-based online support for family caregivers of people with dementia at the end of life. *BMC Palliat Care*. 2019 Dec;18(1):71.
22. Dementia care navigators. *Australian Journal of Dementia Care*. 2019;8(4):4.
23. Dementia Navigator [Internet]. Northern Health and Social Care Trust. [cited 2021 Sep 14]. Available from: <http://www.northerntrust.hscni.net/services/dementia-services/dementia-navigator/>
24. Dementia UK. Closer to home [Internet]. Dementia UK. [cited 2021 Sep 14]. Available from: <https://www.dementiauk.org/get-support/closer-to-home/>
25. Dementia UK. Dementia UK and Leeds Building Society to support 2,500 families in joint Closer to Home project [Internet]. Dementia UK. 2021 [cited 2021 Sep 14]. Available from: <https://www.dementiauk.org/support-families-closer-to-home/>
26. Department of Veterans Affairs. Dementia care coordination program [Internet]. VA Boston Healthcare System. 2018. Available from: <https://www.boston.va.gov/services/DCC/BostonDCCInfoSheet.pdf>
27. Duru OK, Ettner SL, Vassar SD, Chodosh J, Vickrey BG. Cost evaluation of a coordinated care management intervention for dementia. *Am J Manag Care*. 2009 Aug;15(8):521–8.
28. Eichler T, Thyrian JR, Dreier A, Wucherer D, Köhler L, Fiß T, et al. Dementia care management: going new ways in ambulant dementia care within a GP-based randomized controlled intervention trial. *Int Psychogeriatr*. 2014 Feb;26(2):247–56.
29. Eloniemi-Sulkava U, Notkola I-L, Hentinen M, Kivela S-L, Sivenius J, Sulkava R. Effects of supporting community-living demented patients and their caregivers: a randomized trial. *J Am Geriatr Soc*. 2001 Oct;49(10):1282–7.

Anthonisen G, Luke A, MacNeill L, MacNeill AL, Goudreau A, Doucet S. Patient navigation programs for people with dementia, their caregivers, and members of the care team: a scoping review. *JBI Evid Synth*. 2023;21(2). Supplemental Digital Content 1.

30. Eloniemi-Sulkava U, Saarenheimo M, Laakkonen M-L, Pietilä M, Savikko N, Kautiainen H, et al. Family care as collaboration: effectiveness of a multicomponent support program for elderly couples with dementia. Randomized controlled intervention study: effectiveness of support program for couples with dementia. *J Am Geriatr Soc.* 2009 Dec;57(12):2200–8.
31. Fowler CN, Kott K, Wicks MN, Rutledge C. An interprofessional virtual healthcare neighborhood: effect on self-efficacy and sleep among caregivers of older adults with dementia. *J Gerontol Nurs.* 2016 Nov;42(11):39–47.
32. Fowler CN, Kott K, Wicks MN, Rutledge C. Self-efficacy and sleep among caregivers of older adults with dementia: effect of an interprofessional virtual healthcare neighborhood. *J Gerontol Nurs.* 2016 Nov;42(11):39–47.
33. Freeman HP, Gay R, Stefanacci RG, Michael M, Digby D. Alzheimer’s Patient Navigation Model [Internet]. Rockville, Maryland: The Global Council on Alzheimer’s disease; 2016 Jan p. 1–10. Available from: <https://respectcaregivers.org/wp-content/uploads/2016/04/Alzheimers-Patient-Navigation-Model1.pdf>
34. Galvin JE, Valois L, Zweig Y. Collaborative transdisciplinary team approach for dementia care. *Neurodegener Dis Manag.* 2014 Dec;4(6):455–69.
35. Gamble JK, Denning KH. Role of the Admiral Nurse in supporting a person with dementia and their family carer. *Nurs Stand.* 2017 Sep 27;32(5):44–51.
36. Guisado-Fernandez E, Caulfield B, Silva PA, Mackey L, Singleton D, Leahy D, et al. Development of a caregivers’ support platform (connected health sustaining home stay in dementia): protocol for a longitudinal observational mixed methods study. *JMIR Res Protoc.* 2019 Aug 28;8(8):13280.
37. Han H-R. PLAN: dementia literacy education and navigation for Korean elders with probable dementia and their caregivers [Internet]. Johns Hopkins University: clinicaltrials.gov; 2021 Apr [cited 2021 Sep 12]. Report No.: NCT03909347. Available from: <https://clinicaltrials.gov/ct2/show/NCT03909347>
38. Hawai’i Alzheimer’s Disease Initiative. Hawai’i Memory Care Navigator Roadmap [Internet]. Hawai’i: University of Hawai’i; 2016 p. 1–5. Report No.: Version 3.16. Available from: [https://www.hawaii.edu/aging/wp-content/uploads/2016/07/HADI\\_Roadmap\\_FINAL-March-2016.pdf](https://www.hawaii.edu/aging/wp-content/uploads/2016/07/HADI_Roadmap_FINAL-March-2016.pdf)
39. Hayo H. Dementia UK: a look back and a look ahead. *Journal of Community Nursing.* 2018 Jul;32(3).
40. Hennawi G, Courtin O, Crowley E, Brandt N. Reducing healthcare utilization in high risk older adults: The impact of an interprofessional care team. *J Am Geriatr Soc.* 2018 Apr;66:S207.
41. Hennig B, Trestman R. Statewide collaboration between a correctional system and a Huntington’s disease clinical program. *Neurotherapeutics.* 2014 Jan;11(1):217.
42. Hesse E. PRO DEM: A Community-Based Approach to Care for Dementia. *Health Care Financ Rev.* 2005;27(1):89–94.
43. Hettinga, M, De Boer J, Goldberg E, Moelaert F, Adlassnig K, Blobel B, et al. Navigation for people with mild dementia. In: medical informatics in a united and healthy Europe: Proceedings of MIE 2009. Amsterdam: IOS Press; 2009. p. 428–32. (Studies in Health Technology & Informatics).
44. Hickman LD, Neville S, Fischer T, Davidson PM, Phillips JL. Call to action: greater investment in the registered nurse role is required to improve care outcomes for dementia patients living in residential aged care and their families. *Contemporary Nurse.* 2016 May 6;52(2–3):137–9.

Anthonisen G, Luke A, MacNeill L, MacNeill AL, Goudreau A, Doucet S. Patient navigation programs for people with dementia, their caregivers, and members of the care team: a scoping review. *JBI Evid Synth.* 2023;21(2). Supplemental Digital Content 1.

45. Hollister B, Chapman S. Dementia Care Coordination Workforce and Practices in Seven Duals Demonstration States [Internet]. San Francisco: University of California San Francisco Health Workforce Research Center on Long-Term Care; 2015 Nov p. 34. Available from: [https://healthworkforce.ucsf.edu/sites/healthworkforce.ucsf.edu/files/Research\\_Brief-Dementia\\_Care\\_Coordination\\_Workforce\\_and\\_Practices\\_Seven\\_Duals\\_Demonstration\\_States.pdf](https://healthworkforce.ucsf.edu/sites/healthworkforce.ucsf.edu/files/Research_Brief-Dementia_Care_Coordination_Workforce_and_Practices_Seven_Duals_Demonstration_States.pdf)
46. Hollister B, Flatt JD, Chapman SA. Dementia-capable care coordination in duals demonstration programs: workforce needs, promising practices, and policy. *Gerontologist*. 2018 Jul 13;58(4):768–78.
47. Hunt L. Environments Designed to Heal. *Nursing Older People (through 2013)*. 2011 Feb;23(1):14, 16–7.
48. Jensen-Hart S. Practical support for caregivers in navigating financial issues associated with dementia. *Families in Society*. 2018 Dec;99(4):329–32.
49. Keady J. The role of the community psychiatric nurse. *Psychiatry*. 2008 Feb;7(2):70–2.
50. Kehoe P. Transforming dementia care: How a carer’s complaint about lack of dementia support prompted the launch of one of the first Admiral Nursing services in an acute setting. *Nurs Older People*. 2017 Jan 31;29(1):16–8.
51. LaMantia MA, Alder CA, Callahan CM, Gao S, French DD, Austrom MG, et al. The aging brain care medical home: preliminary data. *J Am Geriatr Soc*. 2015 Jun;63(6):1209–13.
52. Lee L, Slonim K, Hillier LM, Lu SK, Lee J. Persons with dementia and care partners’ perspectives on memory clinics in primary care. *Neurodegener Dis Manag*. 2018 Dec 1;8(6):385–97.
53. Lee L, Hillier LM, Gregg S. Partnerships for improving dementia care in primary care: Extending access to primary care-based memory clinics in Ontario, Canada. *Health Soc Care Community*. 2019;27(6):1574–85.
54. Lee L, Hillier LM, Heckman G, Gagnon M, Borrie MJ, Stolee P, et al. Primary Care–Based Memory Clinics: Expanding Capacity for Dementia Care\*. *Can J Aging Rev Can Vieil*. 2014 Sep;33(3):307–19.
55. Liggins CA. National Family Caregiver Support Program (NFCSP): Assessing clients’ characteristics, program utilization and difficulty accessing services [Internet] [Dr.P.H.]. [Maryland]: The Johns Hopkins University; [cited 2021 Sep 14]. Available from: <https://www.proquest.com/pgdtglobal/docview/2213380278/abstract/6C57357C9D4542C0PQ/3>
56. Litzelman DK, Inui TS, Griffin WJ, Perkins A, Cottingham AH, Schmitt-Wendholt KM, et al. Impact of community health workers on elderly patients’ advance care planning and health care utilization: moving the dial. *Medical Care*. 2017 Apr;55(4):319–26.
57. Lockett T, Chenoweth L, Phillips J, Brooks D, Cook J, Mitchell G, et al. A facilitated approach to family case conferencing for people with advanced dementia living in nursing homes: perceptions of palliative care planning coordinators and other health professionals in the IDEAL study. *Int Psychogeriatr*. 2017 Oct;29(10):1713–22.
58. Kristiansen S, Beck M, Kabir ZN, Konradsen H. Providing dementia care using technological solutions: An exploration of caregivers’ and dementia coordinators’ experiences. *J Clin Nurs*. 2020 Aug 25;jocn.15440.

Anthonisen G, Luke A, MacNeill L, MacNeill AL, Goudreau A, Doucet S. Patient navigation programs for people with dementia, their caregivers, and members of the care team: a scoping review. *JBI Evid Synth*. 2023;21(2). Supplemental Digital Content 1.

59. Marek KD, Stetzer F, Adams SJ, Bub LD, Schlidt A, Colorafi KJ. Cost analysis of a home-based nurse care coordination program. *J Am Geriatr Soc.* 2014 Dec;62(12):2369–76.
60. Martinez M, Ye B, Mihailidis A. Usability of a care coordination application to ease family caregiver burden: A dementia case study. *Gerontechnology.* 2018 Oct 8;17(3):181–93.
61. Mazurek J, Szcześniak D, Urbańska K, Dröes R-M, Karczewski M, Rymaszewska J. Does the Meeting Centres Support Programme reduce unmet care needs of community-dwelling older people with dementia? A controlled, 6-month follow-up Polish study. *CIA.* 2019 Jan; 14:113–22.
62. McGillick J, Murphy-White M. Getting to yes or how to encourage person-centered dementia care in hospitals. *Generations.* 2013 Sep 1;37(3):92–6.
63. Meeuwse EJ, Melis RJF, Van Der Aa GCHM, Goluke-Willemse GAM, De Leest BJM, Van Raak FHJM, et al. Effectiveness of dementia follow-up care by memory clinics or general practitioners: randomised controlled trial. *BMJ.* 2012 May 15;344(may15 1):e3086–e3086.
64. Meeuwse EJ, Melis RJF, Adang EM, Goluke-Willemse GA, Krabbe PF, De Leest BJ, et al. Cost-effectiveness of post-diagnosis treatment in dementia coordinated by multidisciplinary memory clinics in comparison to treatment coordinated by general practitioners: An example of a pragmatic trial. *J Nutr Health Aging.* 2009 May 10;13(3):242.
65. Meeuwse E, Melis R, van der Aa G, Goluke-Willemse G, de Leest B, van Raak F, et al. Cost-effectiveness of one year dementia follow-up care by memory clinics or general practitioners: economic evaluation of a randomised controlled trial. Meara JG, editor. *PLoS ONE.* 2013 Nov 25;8(11):e79797.
66. Meiland FJM, Bouman AIE, Sävenstedt S, Bentvelzen S, Davies RJ, Mulvenna MD, et al. Usability of a new electronic assistive device for community-dwelling persons with mild dementia. *Aging Ment Health.* 2012 Jul 1;16(5):584–91.
67. Minghella E, Schneider K. Rethinking a framework for dementia 2: a new model of care. *Working with Older People.* 2012 Apr;16(4):180–9.
68. Minstrell M, Bentley M, Bucher H, Morrissey M, Higgs C, Robinson A, et al. Open referral policy within a nurse-led memory clinic: patient demographics, assessment scores, and diagnostic profiles. *Int Psychogeriatr.* 2015 Jun;27(6):967–79.
69. Morrow-Howell N, Freed DM, Elder WW, Lauderdale S, Carter S. An Integrated Program for Dementia Evaluation and Care Management. *Gerontologist.* 1999 Jun 1;39(3):356–61.
70. Nadash P, Silverstein NM, Porell F. The Dementia Care Coordination Program: Engaging Health Systems in Caregiver Supports. *Dementia.* 2019 May;18(4):1273–85.
71. Nielsen TR, Nielsen DS, Waldemar G. Barriers to post-diagnostic care and support in minority ethnic communities: A survey of Danish primary care dementia coordinators. *Dementia.* 2020 Nov;19(8):2702–13.
72. Nielsen TR, Nielsen DS, Waldemar G. Barriers in access to dementia care in minority ethnic groups in Denmark: a qualitative study. *Aging Ment Health.* 2021 Aug 3;25(8):1424–32.
73. Nowaskie D, Carvell CA, Alder CA, LaMantia MA, Gao S, Brown S, et al. Care coordinator assistants: Job satisfaction and the importance of teamwork in delivering person-centered dementia care. *Dementia.* 2020 Jul;19(5):1560–72.
74. Ontario Shores Centre for Mental Health Sciences. For Caregivers of People with Dementia [Internet]. Ontario Shores Centre for Mental Health Sciences. [cited 2021 Sep 14]. Available from: [https://www.ontarioshores.ca/patients\\_families/family\\_and\\_caregiver\\_resources/for\\_caregivers\\_of\\_people\\_with\\_dementia](https://www.ontarioshores.ca/patients_families/family_and_caregiver_resources/for_caregivers_of_people_with_dementia)

Anthonisen G, Luke A, MacNeill L, MacNeill AL, Goudreau A, Doucet S. Patient navigation programs for people with dementia, their caregivers, and members of the care team: a scoping review. *JBI Evid Synth.* 2023;21(2). Supplemental Digital Content 1.

75. Oostra DL, Nieuwboer MS, Olde Rikkert MGM, Perry M. Development and pilot testing of quality improvement indicators for integrated primary dementia care. *BMJ Open Qual.* 2020 Jun;9(2):e000916.
76. Prestigiacomo J. Overcoming interoperability challenges through HIE. Huntington hospital creates its own community information exchange to coordinate care, aid practice viability. *Healthc Inform.* 2012 May;29(5):36–7.
77. Prusaczyk B, Fabbre V, Morrow-Howell N, Proctor E. Understanding transitional care provided to older adults with and without dementia: a mixed methods study. *Int J Care Coord.* 2020 Mar;23(1):14–23.
78. Public Health Agency of Canada. A Dementia Strategy for Canada: Together We Aspire [Internet]. Ottawa: Public Health Agency of Canada; 2019 Jun [cited 2021 Sep 14]. Available from: <https://www.canada.ca/en/public-health/services/publications/diseases-conditions/dementia-strategy.html>
79. Reuben DB, Evertson LC, Panlilio M, Mihae Kim, Stander K, Tan ZS. The UCLA Alzheimer's and Dementia Care Program: A model program provides comprehensive, coordinated, patient-centered care to people with dementia. *Generations.* 2019 Mar 2;63–7.
80. Reuben DB, Evertson LC, Wenger NS, Serrano K, Chodosh J, Ercoli L, et al. The University of California at Los Angeles Alzheimer's and dementia care program for comprehensive, coordinated, patient-centered care: preliminary data. *J Am Geriatr Soc.* 2013 Dec;61(12):2214–8.
81. Reuben DB, Gill TM, Stevens A, Williamson J, Volpi E, Lichtenstein M, et al. D-CARE: the dementia care study: design of a pragmatic trial of the effectiveness and cost effectiveness of health system-based versus community-based dementia care versus usual dementia care. *J Am Geriatr Soc.* 2020 Nov;68(11):2492–9.
82. Richters A, Nieuwboer MS, Olde Rikkert MGM, Melis RJF, Perry M, van der Marck MA. Longitudinal multiple case study on effectiveness of network-based dementia care towards more integration, quality of care, and collaboration in primary care. Werner P, editor. *PLoS ONE.* 2018 Jun 27;13(6):e0198811.
83. Ruggiano N, Brown EL, Shaw S, Geldmacher D, Clarke P, Hristidis V, et al. The potential of information technology to navigate caregiving systems: perspectives from dementia caregivers. *J Gerontol Soc Work.* 2019 May 19;62(4):432–50.
84. Sadarangani TR, Salcedo V, Chodosh J, Kwon S, Trinh-Shevrin C, Yi S. Redefining the Care Continuum to Create a Pipeline to Dementia Care for Minority Populations. *J Prim Care Community Health.* 2020 Jan;11:1-4.
85. Salfi J. Seeking to understand telephone support for dementia caregivers: A qualitative case study [Internet] [Dissertation]. [Canada]: McMaster University; 2004. Available from: <https://macsphere.mcmaster.ca/bitstream/11375/7569/1/fulltext.pdf>
86. Schwartz A. Quality care coordination can improve lives of Alzheimer's patients and their caregivers. *Science of Caring.* 2016 Jul;1–6.
87. Sörensen S, Mak W, Pinquart M. Planning and Decision Making for Care Transitions. *Annu Rev Gerontol Geriatr.* 2011 Nov 1;31(1):111–42.
88. Spilsbury K. Telephone support met the perceived needs of dementia caregivers for convenient access to information, referral, and emotional support. *Evid Based Nurs.* 2006 Jul 1;9(3):94–94.
89. Stefanacci R, Freeman HP, Michael M, Digby D. Community long-term care and the Alzheimer's disease patient navigator. *Annals of Long-Term Care.* 2016;24(5):19–21.

Anthonisen G, Luke A, MacNeill L, MacNeill AL, Goudreau A, Doucet S. Patient navigation programs for people with dementia, their caregivers, and members of the care team: a scoping review. *JBI Evid Synth.* 2023;21(2). Supplemental Digital Content 1.



90. Tan ZS, Hamade W, Menkin J, Pacheco RG, Gans D, Weintraub N, et al. Dementia and Falls Management in Underserved Populations: The Cognition and Mobility Care Management Program. *J Am Geriatr Soc*. 2021 Jan;69(1):210–5.
91. Tan ZS, Jennings L, Reuben D. Coordinated care management for dementia in a large academic health system. *Health Affairs*. 2014 Apr;33(4):619–25.
92. Vollenberg M, Schalk R, Merks-Van Brunschot I. How to coordinate care for people with dementia? A case study of a region in the Netherlands. *Dementia*. 2013 Sep;12(5):513–22.
93. Yu DS-F, Li PW, Zhang F, Cheng S-T, Ng TK, Judge KS. The effects of a dyadic strength-based empowerment program on the health outcomes of people with mild cognitive impairment and their family caregivers: a randomized controlled trial. *CIA*. 2019 Oct; 14:1705–17.

**Reason for exclusion: Ineligible source type (n = 68)**

1. Agar M, Chenoweth L, Goodall S, Beattie E, Luscombe G, Pond D, et al. Implementing facilitated case conferencing for aged care residents with advanced dementia-development of a palliative care planning coordinator role. *Palliat Med*. 2016 Jun;30(6):NP1–401.
2. Aguirre AB, Bertelson JA, Paydarfar D, Rousseau J, Henry ML, Finger AH, et al. Combining value-based and collaborative care models in dementia care. *Alzheimers Dement*. 2019 Jul;15(7):P802–3.
3. Austrom MG, Alder C, LaMantia M, Litzelman DK, Cottingham AH, Boustani M. Meeting the needs of a rapidly aging population: Task shifting and the development of a new work force. *Alzheimers Dement*. 2014;10:P224.
4. Austrom MG, Alder C, LaMantia M, Litzelman DK, Cottingham AH, Callahan CM, et al. Aging brain care program: Workforce development one year in. *J Am Geriatr Soc*. 2014 Mar;62:s71.
5. Austrom MG, Carvell CA, Gao S, Boustani M, LaMantia M. Developing a new workforce to provide person-centered care in community settings. *Alzheimers Dement*. 2015;11(7):P855-586.
6. Backhouse A, Ukoumunne OC, Richards DA, McCabe R, Watkins R, Dickens C. The effectiveness of community-based coordinating interventions in dementia care: a meta-analysis and subgroup analysis of intervention components. *BMC Health Serv Res*. 2017 Dec;17(1):717.
7. Banerjee S, Argáez C. Patient Navigation Programs for People With Dementia. [Internet]. 2021 Feb 23 [cited 2021 Sep 14];1(2). Available from: <https://canjhealthtechnol.ca/index.php/cjht/article/view/rc1333>
8. Bergman H. Current change in Alzheimer’s disease care in Quebec: From the proposed action plan to innovative approaches in family medicine groups (FMGs). *Alzheimer’s & Dementia*. 2012 Jul;8(4):P442–3.
9. Brodaty H, Donkin M. Family caregivers of people with dementia. *Dialogues Clin Neurosci*. 2009 Jun;11(2):217–28.
10. Blair. First Link Partnerships® [Internet]. Alzheimer Society of Toronto: Alzheimer’s Disease & Dementia. [cited 2021 Sep 16]. Available from: <https://alz.to/dementia-programs-activities/first-link-partnership/>
11. Brungardt A, Marcus A, Hartley K, Pearson S, Fixen D, Linnebur S, et al. Adaptation and implementation of a dementia care program in an academic geriatric primary care clinic. *J Am Geriatr Soc*. 2019 Apr;67(S1):S1–384.

Anthonisen G, Luke A, MacNeill L, MacNeill AL, Goudreau A, Doucet S. Patient navigation programs for people with dementia, their caregivers, and members of the care team: a scoping review. *JBI Evid Synth*. 2023;21(2). Supplemental Digital Content 1.

12. Chiong W, Hooper SM, Lui K, Bonasera S, Merrilees J, Dulaney S, et al. Financial activities and errors in patients with dementia: Baseline findings from the Care Ecosystem study. *Alzheimers Dement*. 2017;13(7):P1435–6.
13. Dang S, Nedd N, Roos B. Utilization of TLC technology by dementia family caregivers. *Gerontologist*. 2004;44(1):604.
14. Dementia Australia. Dementia Care Navigator trials in Perth and Dubbo [Internet]. Dementia Australia. 2019 [cited 2021 Sep 16]. Available from: <https://www.dementia.org.au/node/92510>
15. Dulaney S, Lui K, Merrilees J, Kuo A, Choi J, Ragosta M, et al. Care ecosystem: care navigation for people living alone with cognitive impairment. *Alzheimers Dement*. 2019 Jul;15:P1154.
16. Dulaney S, Merrilees J, Braley T, Feuer J, Clark AM, Lee K, et al. The care ecosystem training program: Preparing lay health workers for a new role in dementia care. *J Am Geriatr Soc*. 2018 Apr;66:S82.
17. Dys S, Smith L, Tunalilar O, Carder P. Revisiting the role of physicians in assisted living and residential care settings. *Gerontol Geriatr Med*. 2020 Jan 1;6:2333721420979840.
18. Foulds P, Trott V. P-104 Dementia hubs in a hospice. In: Patient care [Internet]. *BMJ Supportive & Palliative Care*; 2017 [cited 2021 Sep 15]. p. A46.3-A47. Available from: <https://spcare.bmj.com/lookup/doi/10.1136/bmjspcare-2017-hospice.130>
19. Garcia G, Gosselin K, McCarthy L. [p1–514]: Dementia care coordination program. *Alzheimers Dement*. 2017;13(7):P490.
20. Gaugler JE. Translation and implementation: essential applied gerontology. *J Appl Gerontol*. 2017 May;36(5):515–8.
21. Grieb B, Bonasera S. Caregiver burden: an analysis and comparison for the Nebraska and Iowa dementia Sare Ecosystem. *J Am Geriatr Soc*. 2015 Apr;63:S266.
22. Grosz Z, Pék G, Báthori G, Molnár JM. H20 Initiating and setting up a patient advocacy group for huntington’s disease in hungary. *J Neurol Neurosurg Psychiatry*. 2018 Sep 1;89(Suppl 1):A74–5.
23. Gruss V, Hasnain M, Koronkowski M, Baccellieri A. Transforming healthcare with mobile devices: A “dementia guide” app for persons with dementia and caregivers. *Intern Med J*. 2017 May;65:S235.
24. Ho AK, Armstrong R, Levy S. K15 Insight into the huntington’s disease patient experience and interest in psychological input. *J Neurol Neurosurg Psychiatry*. 2016 Sep;87(1):A84.
25. Hughes S, Lepore M, Wiener JM, Elizabeth G. Research on Care Coordination for People with Dementia and Family Caregivers [Internet]. Washington, D.C.: Research Summit on Dementia Care; 2021 Mar [cited 2021 Sep 14]. Available from: <https://aspe.hhs.gov/reports/research-care-coordination-people-dementia-family-caregivers-0>
26. Hung WW. Collaborative dementia care via telephone and internet improves quality of life and reduces caregiver burden: Review. *J Clin Outcomes Manag*. 2020;27(1):12–4.
27. Iglesias Lino L, Stein L, Santos E. Development of a dementia support group within a community health center. *J Am Geriatr Soc*. 2018 Apr;66:S116–7.
28. Johnson D. “Maximizing independence at home” for people with dementia and their caregivers: Developing, implementing, and disseminating best practices. *Am J Geriatr Psychiatry*. 2017;25(3):S11.
29. Johnson L. Age UK Newcastle’s dementia navigation service. In: *The Ageing Patient: Midlife and Beyond*. London: Pavilion Publishing & Media Ltd; 2015. p. 1.

Anthonisen G, Luke A, MacNeill L, MacNeill AL, Goudreau A, Doucet S. Patient navigation programs for people with dementia, their caregivers, and members of the care team: a scoping review. *JBI Evid Synth*. 2023;21(2). Supplemental Digital Content 1.



30. Johnston D, Samus QM, Black B, Lyketsos C. Development of a person-centered, community-based, multifaceted, dementia care-coordination program: MIND at Home. *J Am Geriatr Soc*. 2015 Apr;63:S211.
31. Kallmyer B. PC-09: Community resources for individuals and families: Web-based support. *Alzheimer's & Dementia*. 2012;8(4):P2.
32. Kind AJ, Gilmore-Bykovskiy A, Kennelty K, Jensen L, Schmitz E, Hermann C, et al. O2-01-03: The Coordinated-Transitional Care (c-Trac) Program: Supporting Patients with Alzheimer's Dementia (ad) and Their Caregivers During Care Transitions from the Hospital to the Community. *Alzheimers Dement*. 2016;12(7):P221–2.
33. Kind AJ, Jensen L, Bridges A, Kordahl R, Smith M, Asthana S. The VA Coordinated-Transitional Care (C-TRAC) program: A registered nurse telephone-based initiative to improve transitions for hospitalized veterans with dementia and other high-risk conditions. *J Am Geriatr Soc*. 2012 Apr;60:S171.
34. King J, Goeman D, Koch S. P2-232: Dementia care in the community: access for culturally and linguistically diverse communities. *Alzheimers Dement*. 2015;11(7):P581.
35. Krause M, Bonasera S. End-of-life decision making tools: an analysis and comparison for the Nebraska Dementia Care Ecosystem. *J Am Geriatr Soc*. 2015 Apr;63:S269–70.
36. LaMantia M, Alder CA, Austrom MG, Cottingham A, Litzelman DK, Boustany K, et al. O3-01-06: The Aging Brain Care Medical Home Program: Accomplishments and Lessons Learned at One Year. *Alzheimers Dement*. 2014;10(4):P209.
37. Lo T, Maitland L. Service model for supporting people with Huntington's Disease (HD) within Brightwater care group. *Clinical Genetics*. 2011 Sep;80:66.
38. Madison C, Dunn N, Dioquino Y, Hahn H. P2 - 320: Model for collaborative care using a care navigation team to provide enhanced psychosocial support services at the Brain Health Center at CPMC in San Francisco, California. *Alzheimers Dement*. 2012 Jul;8(4):P374–5.
39. Madison C, Edgerly E. P3 - 310: Partnering to improve care: Developing a partnership between philanthropy, a private medical center and the Alzheimer's Association of Northern California and northern Nevada. *Alzheimer's & Dementia*. 2012 Jul;8(4):P567–8.
40. Maestre GE, Fernandez F. Wrap-around services to older adults with dementia: collaboration, education, and prevention as a model for integration of primary care and neurobehavioral health. *Alzheimers Dement*. 2019 Jul;15(7):P205.
41. Manivannan M, Heunis J, Hooper SM, Lui KP, Possin K, Chiong W. P4-621: Multidisciplinary care coordination addressing financial vulnerability in dementia: qualitative findings from the care ecosystem study. *Alzheimers Dement*. 2019;15(7):P1565.
42. McGurin N, Budson A, Gosselin E, Patterson B. Dementia care coordination: impact on patient and caregiver outcomes. *Alzheimer's and Dementia*. 2016;12(7):P794.
43. McGurin N, Nadash P, Silverstein N, Porell F, Rowlett S. Dementia care coordination: building partnerships to improve quality of care for persons living with Alzheimer's disease. *Alzheimers Dement*. 2015;11(7):P191.
44. Memory Care Navigator - Memory Loss Support [Internet]. Sun Health Wellness. 2020 [cited 2021 Sep 16]. Available from: <http://localhost:3000/memory-care-navigator>
45. Merrilees J, Dulaney S, Choi J, Yeung C, D'Aguiar Rosa T, Lee K, et al. P2-526: The Care Ecosystem: designing workflow for a system of navigated care in dementia. *Alzheimers Dement* [Internet].

Anthonisen G, Luke A, MacNeill L, MacNeill AL, Goudreau A, Doucet S. Patient navigation programs for people with dementia, their caregivers, and members of the care team: a scoping review. *JBI Evid Synth*. 2023;21(2). Supplemental Digital Content 1.

- 2018 Jul [cited 2021 Sep 15];14(7): P937. Available from: <https://onlinelibrary.wiley.com/doi/10.1016/j.jalz.2018.06.1220>
46. National Health Service. Improving access: dementia care navigators in Gateshead [Internet]. NHS England. 2015 [cited 2021 Sep 16]. Available from: <https://www.england.nhs.uk/gp/case-studies/primary-care-navigators/>
  47. Navigating Dementia [Internet]. LiveWell. 2019. Available from: <https://livewell.org/navigating-dementia/>
  48. Ordóñez MD, Hain DD, Bensadon BA. P3-331: Bridging the gap: providing specialized dementia care and supportive services through community partnerships (Bgdcs-Cp). *Alzheimers Dement*. 2016;12(7):P973–4.
  49. Peart A, Lewis V, Brown T, Russell G. Patient navigators facilitating access to primary care: a scoping review. *BMJ Open*. 2018 Mar;8(3):e019252.
  50. Phung A, Chapman M, Smith D, Green A. Facilitating care coordination for older adults with cognitive impairment: A qualitative study of primary care encounters. *J Am Geriatr Soc*. 2019 Apr;67(S1):S308-309.
  51. Poole M, Bamford C, McLellan E, Coe D, Hrisos S, Robinson L, et al. 15 Is a dementia nurse specialist a feasible and acceptable way to improve care towards end of life in dementia? In: Oral presentations [Internet]. British Medical Journal Publishing Group; 2019 [cited 2021 Sep 15]. p. A6.1-A6. Available from: <https://spcare.bmj.com/lookup/doi/10.1136/bmjspcare-2019-ASP.14>
  52. Rao V, Stark K, Lindsey D, Kowgitz M, Donnelly L, Crawford M, et al. Impact of nurse scripting on cognitive impairment testing using the mini-cog in patients hospitalized for heart failure. *Journal of Cardiac Failure*. 2017;23(8):S97.
  53. Reilly P, Buggy A, Dewergifosse J, Mullarkey C, O’Neill D, Kennelly S. Tallaght Integrated Care for Older Persons Team – Bridging the Gap. *Age and Ageing*. 2017 Sep;46(3):iii13.
  54. Rivera J, Powers J. Veterans cognitive assessment and management program (V-CAMP). *Intern Med J*. 2017 May;47:S175.
  55. Rosa TD, Possin KL, Merrilees J, Dulaney S, Matuoka J, Lee KP, et al. The implementation costs of a personalized chronic care management program for dementia. *Alzheimers Dement*. 2018;14(7):P1664.
  56. Ruggiano N, Brown EL, Li J, Scaccianoce M. Rural dementia caregivers and technology: what is the evidence? *Res Gerontol Nurs*. 2018 Jul;11(4):216–24.
  57. Schellinger S, Anderson E, Britt H, Radel K. Team-based supportive care approach late in life: An ongoing relationship provided by a nonclinical care guide and clinical team supporting the medical and nonmedical needs of patients, families, and caregivers. Will the addition of a nonclinical member to the “hospice Type” interdisciplinary team support individuals late in life? *J Palliat Med*. 2014 Mar;17(3):A2.
  58. Stout M, Davagnino J, Sloane R, Ramlal N, Twersky J. Dying at home: Dispositions for veterans in the coach program at the end of life. *J Am Geriatr Soc*. 2019 Apr;67(1):S202–3.
  59. Tam S, McGuire C, Lutze M, Odom M, Tryon C, Gibbs L. Findings from key stakeholders in developing a dementia care management program. *J Am Geriatr Soc*. 2018 Apr;66(2):S52.
  60. Tanner JA, Black BS, Johnston D, Hess E, Rabins P, Lyketsos C, et al. Effectiveness of a multicomponent care coordination intervention on dementia caregivers in the community—a randomized control trial. *Am J Geriatr Psychiatry*. 2013;21(3):S97–8.

Anthonisen G, Luke A, MacNeill L, MacNeill AL, Goudreau A, Doucet S. Patient navigation programs for people with dementia, their caregivers, and members of the care team: a scoping review. *JBI Evid Synth*. 2023;21(2). Supplemental Digital Content 1.

61. The Dementia Care Coordination Program [Internet]. Blue Cross & Blue Shield of Rhode Island. 2020 [cited 2021 Sep 16]. Available from: <https://www.bcbsri.com/providers/update/dementia-care-coordination-program>
62. Using Care Navigation to Address Caregiver Burden in Dementia: A Qualitative Case Study Analysis [Internet]. UCSF Philip R. Lee Institute for Health Policy Studies. 2020 [cited 2021 Sep 14]. Available from: <https://healthpolicy.ucsf.edu/using-care-navigation-address-caregiver-burden-dementia-qualitative-case-study-analysis>
63. Veenhuizen R. J16 Coordinated multidisciplinary care for ambulatory HD-patients. Appreciation by patients, caregivers and healthcare professionals. *J Neurol Neurosurg Psychiatry*. 2010 Sep;81(1):A44.
64. Veenhuizen R, Ekkel M, Messchaert E, Buul L van, Hertogh C. H07 A huntington's disease outpatient clinic in a nursing home; ten years of experience. In: *Clinical care and clinical services* [Internet]. BMJ Publishing Group Ltd; 2018 [cited 2021 Sep 15]. p. A70.2-A70. Available from: <https://jnnp.bmj.com/lookup/doi/10.1136/jnnp-2018-EHDN.188>
65. Wong SK, Roth DL, Huang J, Johnston D, Rabins P, Gitlin L, et al. The maximizing independence (MIND) at home care coordination program for elders with memory disorders: Effect on service utilization. *J Am Geriatr Soc*. 2014 Mar;62:59.
66. Worthington G. Dementia Care Coordinator [Internet]. Center for Nonprofit Excellence. 2017 [cited 2021 Sep 16]. Available from: <https://www.thecne.org/connect/jobs/dementia-care-manager/>
67. Yan S. P2-390: The effectiveness of tele-homecare for the caregiver of a dementia patient. *Alzheimer's & Dementia* [Internet]. 2011 Jul [cited 2021 Sep 15];7(4S\_Part\_12). Available from: <https://onlinelibrary.wiley.com/doi/10.1016/j.jalz.2011.05.1263>
68. Yong J, Cheung SL, Tong K, Lim J, Phua LL, See C, et al. An integrated approach to dementia care in a community hospital in Singapore. *Int J Integr Care*. 2017 Oct 17;17(5):575.

**Reason for exclusion: Did not discuss the population of interest (n = 7)**

1. Care Coordination Services [Internet]. Illinois Department on Aging. [cited 2021 Sep 14]. Available from: <https://www2.illinois.gov/aging/programs/Pages/case-mgmt.aspx>
2. Caughman CS. Designing a Care Coordination Model for Older Adults [Internet] [Ed.D.]. [United States -- California]: University of Southern California; [cited 2021 Sep 14]. Available from: <https://www.proquest.com/pqdtglobal/docview/2383214443/abstract/6C57357C9D4542C0PQ/2>
3. COTA Australia. Aged Care Navigators [Internet]. Council on the Ageing Australia. [cited 2021 Sep 14]. Available from: <https://www.cota.org.au/information/aged-care-navigators/>
4. Gabbard J, Pajewski N, Callahan KE, Dharod A, Foley K, Ferris K, et al. Advance care planning for vulnerable older adults within an Accountable Care Organization: study protocol for the IMPACT randomised controlled trial. *BMJ Open*. 2019 Dec;9(12):e032732.
5. Jansen L, Forbes DA, Markle-Reid M, Hawranik P, Kingston D, Peacock S, et al. Formal care providers' perceptions of home- and community-based services: informing dementia care quality. *Home Health Care Services Quarterly*. 2009 Mar 11;28(1):1–23.
6. Jasper R, Hughes J, Sutcliffe C, Abendstern M, Loynes N, Challis D. Accessing care coordination information: the non-statutory sector contribution. *QAOA*. 2016 Dec 12;17(4):263–71.

Anthonisen G, Luke A, MacNeill L, MacNeill AL, Goudreau A, Doucet S. Patient navigation programs for people with dementia, their caregivers, and members of the care team: a scoping review. *JBI Evid Synth*. 2023;21(2). Supplemental Digital Content 1.

7. Schuler E. Patient Navigators - Who We Are and What We Do [Internet]. Patient Navigator. 2020 [cited 2021 Sep 14]. Available from: <https://patientnavigator.com/patient-navigators-who-we-are-and-what-we-do/>

**Reason for exclusion: Needs assessment or prospective study for a potential patient navigation program (n = 15)**

1. Boone L, Braun J. Policy Options for Adopting Patient Navigation into Alzheimer's Care and Support with Annotated Bibliography of Key Studies. Splaine Consulting. 2012;22.
2. Borson S, Chodosh J. Developing Dementia-Capable Health Care Systems. *Clin Geriatr Med*. 2014;30(3):395–420.
3. Fillit HM. Why managed care organizations should care about Alzheimer's disease. *Formulary*. 2003;38:3.
4. Fox S, O'Connor N, Drennan J, Guerin S, Kernohan WG, Murphy A, et al. Components of a community model of dementia palliative care. *JICA*. 2020 Jun 30;28(4):349–64.
5. Hagan RJ. What next? Experiences of social support and signposting after a diagnosis of dementia. *Health Soc Care Community*. 2020;28(4):1170–9.
6. Kennerley D, Bolas R, Bourne J, Branson K, Cavenagh P, Chappell P, et al. Collaborative project to co-ordinate care for patients with dementia: An initiative that drew on local knowledge, resources and carer input has improved patients' experiences in Suffolk and, although specific to dementia services, the process could be applied to other settings, says the Suffolk Nurse Leaders Group. *Nursing Management*. 2011;18(2):27–31.
7. Kondro W. Dementia strategy urged. *Canadian Medical Association Journal*. 2010;182(3):E169–70.
8. Litzelman DK, Inui TS, Griffin WJ, Perkins A, Cottingham AH, Schmitt-Wendholt KM, et al. Impact of community health workers on elderly patients' advance care planning and health care utilization: moving the dial. *Medical Care*. 2017 Apr;55(4):319–26.
9. Pickard S. Co-ordinated care for older people with dementia. *J Interprof Care*. 1999 Jan 1;13(4):345–54.
10. Prorok JC, Hussain M, Horgan S, Seitz DP. 'I shouldn't have had to push and fight': health care experiences of persons with dementia and their caregivers in primary care. *Aging Ment Health*. 2017 Aug 3;21(8):797–804.
11. Renehan E, Goeman D, Koch S. Development of an optimised key worker framework for people with dementia, their family and caring unit living in the community. *BMC Health Serv Res*. 2017 Dec;17(1):501.
12. Ruggiano N, Brown E, Fortuna K. Adult day service providers: untapped potential for care coordination. *Nursing & Health Sciences Research Journal*. 2018 Feb 23;1(1):46–52.
13. Røthing M, Malterud K, Frich JC. Family caregivers' views on coordination of care in Huntington's disease: a qualitative study. *Scand J Caring Sci*. 2015 Dec;29(4):803–9.
14. Ruggiano N, Brown E, Fortuna K. Adult day service providers: untapped potential for care coordination. *Nursing & Health Sciences Research Journal*. 2018 Feb 23;1(1):46–52.
15. Salfi J, Ploeg J, Black ME. Seeking to understand telephone support for dementia caregivers. *West J Nurs Res*. 2005 Oct 1;27(6):701–21.

Anthonisen G, Luke A, MacNeill L, MacNeill AL, Goudreau A, Doucet S. Patient navigation programs for people with dementia, their caregivers, and members of the care team: a scoping review. *JBI Evid Synth*. 2023;21(2). Supplemental Digital Content 1.

**Reason for exclusion: Duplicate (n = 31)**

1. Agar M, Lockett T, Luscombe G, Phillips J, Beattie E, Pond D, et al. Effects of facilitated family case conferencing for advanced dementia: a cluster randomised clinical trial. Quinn TJ, editor. PLoS ONE. 2017 Aug 7;12(8):e0181020.
2. Amjad H, Wong SK, Roth DL, Huang J, Willink A, Black BS, et al. Health services utilization in older adults with dementia receiving care coordination: the MIND at Home trial. Health Serv Res. 2018 Feb;53(1):556–79.
3. Bass DM, Judge KS, Maslow K, Wilson NL, Morgan RO, McCarthy CA, et al. Impact of the care coordination program “Partners in Dementia Care” on veterans’ hospital admissions and emergency department visits. *Alzheimers Dement (N Y)*. 2015 Jun;1(1):13–22.
4. Bass DM, Judge KS, Snow AL, Wilson NL, Morgan R, Looman WJ, et al. Caregiver outcomes of partners in dementia care: effect of a care coordination program for veterans with dementia and their family members and friends. *J Am Geriatr Soc*. 2013 Aug;61(8):1377–86.
5. Bernstein A, Harrison KL, Dulaney S, Merrilees J, Bowhay A, Heunis J, et al. The role of care navigators working with people with dementia and their caregivers. *J Alzheimers Dis*. 2019;71(1):45–55.
6. Chodosh J, Pearson ML, Connor KI, Vassar SD, Kaisey M, Lee ML, et al. A dementia care management intervention: which components improve quality. *Am J Manag Care*. 2012 Feb 1;18(2):85–94.
7. Grosz Z, Pék G, Báthori G, Molnár JM. H2O Initiating and setting up a patient advocacy group for Huntington’s disease in Hungary. *J Neurol Neurosurg Psychiatry*. 2018 Sep 1;89(Suppl 1):A74–5.
8. Hagan RJ. What next? Experiences of social support and signposting after a diagnosis of dementia. *Health Soc Care Community*. 2020 Jul;28(4):1170–9.
9. Hollister B, Flatt JD, Chapman SA. Dementia-capable care coordination in duals demonstration programs: workforce needs, promising practices, and policy. *Gerontologist*. 2018 Jul 13;58(4):768–78.
10. Hung WW. Collaborative dementia care via telephone and internet improves quality of life and reduces caregiver burden: Review. *J Clin Outcomes Manag*. 2020;27(1):12–4.
11. Judge KS, Bass DM, Snow AL, Wilson NL, Morgan R, Looman WJ, et al. Partners in dementia care: a care coordination intervention for individuals with dementia and their family caregivers. *Gerontologist*. 2011;51(2):261–72.
12. Lee L, Hillier LM, Heckman G, Gagnon M, Borrie MJ, Stolee P, et al. Primary care-based memory clinics: expanding capacity for dementia care. *Can J Aging*. 2014;33(3):307–19.
13. Liu T-L, Yates TD, Taylor YJ, Rossman W, Mangieri D, Black S, et al. Patient and caregiver outcomes and experiences with team-based memory care: a mixed methods study. *J Appl Gerontol*. 2019;0733464819888838.
14. McAiney CA, Hillier LM, Stolee P, Harvey D, Michael J. ‘Throwing a lifeline’: the role of First Link™ in enhancing support for individuals with dementia and their caregivers. *Neurodegener Dis Manag*. 2012;2(6):623–38.
15. Meeuwse EJ, Melis RJF, Adang EM, Golüke-Willemse GA, Krabbe PF, De Leest BJ, et al. Cost-effectiveness of post-diagnosis treatment in dementia coordinated by multidisciplinary memory clinics in comparison to treatment coordinated by general practitioners: an example of a pragmatic trial. *J Nutr Health Aging*. 2009 May 10;13(3):242.

Anthonisen G, Luke A, MacNeill L, MacNeill AL, Goudreau A, Doucet S. Patient navigation programs for people with dementia, their caregivers, and members of the care team: a scoping review. *JBI Evid Synth*. 2023;21(2). Supplemental Digital Content 1.

16. Merrilees JJ, Bernstein A, Dulaney S, Heunis J, Walker R, Rah E, et al. The Care Ecosystem: Promoting self-efficacy among dementia family caregivers. *Dementia*. 2020;19(6):1955–73.
17. Nadash P, Silverstein NM, Porell F. The dementia care coordination program: engaging health systems in caregiver supports. *Dementia*. 2019;18(4):1273–85.
18. Nielsen TR, Nielsen DS, Waldemar G. Barriers to post-diagnostic care and support in minority ethnic communities: a survey of Danish primary care dementia coordinators. *Dementia*. 2020;19(8):2702–13.
19. Possin KL, Merrilees JJ, Dulaney S, Bonasera SJ, Chiong W, Lee K, et al. Effect of collaborative dementia care via telephone and internet on quality of life, caregiver well-being, and health care use: the care ecosystem randomized clinical trial. *JAMA Intern Med*. 2019;179(12):1658–1667.
20. Reichert M, Hampel S, Reuter V. Mobile Demenzberatung als niedrigschwelliges Hilfeangebot für pflegende Angehörige. *Z Gerontol Geriatr*. 2016 Apr;49(3):181–6.
21. Reuben DB, Evertson LC, Panlilio M, Mihae Kim, Stander K, Tan ZS. The UCLA Alzheimer's and dementia care program: a model program provides comprehensive, coordinated, patient-centered care to people with dementia. *Generations*. 2019 Mar 2;63–7.
22. Rosa TD, Possin KL, Bernstein A, Merrilees J, Dulaney S, Matuoka J, et al. Variations in costs of a collaborative care model for dementia. *J Am Geriatr Soc*. 2019;67(12):2628–33.
23. Ruggiano N, Brown EL, Shaw S, Geldmacher D, Clarke P, Hristidis V, et al. The potential of information technology to navigate caregiving systems: perspectives from dementia caregivers. *J Gerontol Soc Work*. 2019;62(4):432–50.
24. Samus QM, Black BS, Reuland M, Leoutsakos J-MS, Pizzi L, Frick KD, et al. MIND at Home—Streamlined: Study protocol for a randomized trial of home-based care coordination for persons with dementia and their caregivers. *Contemp Clin Trials*. 2018;71:103–12.
25. Samus QM, Davis K, Willink A, Black BS, Reuland M, Leoutsakos J, et al. Comprehensive home-based care coordination for vulnerable elders with dementia: Maximizing Independence at Home-Plus—study protocol. *Int J Care Coord*. 2017;20(4):123–34.
26. Samus Q, Johnston D, Black B, Hess E, Lyman C, Vavilikolanu A, et al. A multidimensional home-based care coordination intervention for elders with memory disorders: the Maximizing Independence at Home (MIND) pilot randomized trial. *Am J Geriatr Psychiatry*. 2014 Apr;22(4):398–414.
27. Silverstein N, Porell F, Nadash P. The Alzheimer's Association dementia care coordination program: a process evaluation, executive summary [Internet]. Boston, Massachusetts: Gerontology Institute, McCormack Graduate School of Policy & Global Studies, University of Massachusetts; 2015 Jul p. 14. (Gerontology Institute Publications). Available from: [https://scholarworks.umb.edu/gerontologyinstitute\\_pubs/111](https://scholarworks.umb.edu/gerontologyinstitute_pubs/111)
28. Sörensen S, Mak W, Pinquart M. Planning and decision making for care transitions. *annu rev gerontol geriatr*. 2011 Nov 1;31(1):111–42.
29. Tanner JA, Black BS, Johnston D, Hess E, Leoutsakos J-M, Gitlin LN, et al. A randomized controlled trial of a community-based dementia care coordination intervention: effects of MIND at Home on caregiver outcomes. *Am J Geriatr Psychiatry*. 2015 Apr;23(4):391–402.
30. Willink A, Davis K, Johnston DM, Black B, Reuland M, Stockwell I, et al. Cost-effective care coordination for people with dementia at home. *Innov Aging*. 2020;4(2):igz051.

Anthonisen G, Luke A, MacNeill L, MacNeill AL, Goudreau A, Doucet S. Patient navigation programs for people with dementia, their caregivers, and members of the care team: a scoping review. *JBI Evid Synth*. 2023;21(2). Supplemental Digital Content 1.



31. Veenhuizen R. J16 Coordinated multidisciplinary care for ambulatory HD-patients. Appreciation by patients, caregivers and healthcare professionals. *J Neurol Neurosurg Psychiatry*. 2010 Sep;81(Suppl 1):A44.2-A44.

**Reason for exclusion: Did not contain enough information (gray literature) (n = 14)**

1. Alberta Health Services. Navigation Services [Internet]. Alberta Health Services. [cited 2021 Sep 14]. Available from: <https://www.albertahealthservices.ca/info/Page16899.aspx>
2. Angela. When it comes to patient navigation, apps alone aren't the answer [Internet]. *Medical Confidence*. 2020 [cited 2021 Sep 14]. Available from: <https://medicalconfidence.com/blog/patient-navigation-apps-alone-not-answer/>
3. Belfast Health & Social Care Trust. Dementia Navigator [Internet]. Belfast Health & Social Care Trust. [cited 2021 Sep 14]. Available from: <https://belfasttrust.hscni.net/service/dementia-navigator/>
4. Blair. First Link® Care Navigation [Internet]. Alzheimer Society of Toronto: Alzheimer's Disease & Dementia. [cited 2021 Sep 14]. Available from: <https://alz.to/dementia-programs-activities/first-link-care-navigation/>
5. Cost-effective care coordination for people with dementia at home [Internet]. CHW Central. 2020 [cited 2021 Sep 14]. Available from: <https://chwcentral.org/resources/cost-effective-care-coordination-for-people-with-dementia-at-home/>
6. Dementia Care Navigator – Western Sydney [Internet]. Dementia Australia. [cited 2021 Sep 14]. Available from: <https://www.dementia.org.au/node/89966>
7. French DD, LaMantia MA, Livin LR, Herceg D, Alder CA, Boustani MA. Healthy Aging Brain Center Improved Care Coordination And Produced Net Savings. *Health Affairs*. 2014 Apr;33(4):613–8.
8. Hoe J. Risk Assessment and Increasing Safety in Dementia: RAISe-Dementia study [Internet]. London: Centre for Mental Health Sciences, School of Health Sciences, University of London; 2019 May p. 1–16. Report No.: Dunhill Medical Trust Grant RPF1711\10. Available from: <https://pr-journal.s3.amazonaws.com/bhff6xr6.pdf>
9. Johns Hopkins Medicine. Making the Most of Dementia Care at Home [Internet]. Hopkins Brain Wise. 2015 [cited 2021 Sep 14]. Available from: <https://www.hopkinsmedicine.org/news/articles/making-the-most-of-dementia-care-at-home>
10. Manitoba Health and Seniors Care. Manitoba's Framework for Alzheimer's Disease and Other Dementias [Internet]. Manitoba: Department of Health and Seniors Care; 2014 p. 1–32. Available from: <https://www.gov.mb.ca/health/documents/alzframework.pdf>
11. Ontario Provincial Government. New Patient Navigators to Assist Every Person Diagnosed with Dementia to Access the Right Care [Internet]. News.Ontario.ca. 2017 [cited 2021 Sep 14]. Available from: <https://news.ontario.ca/en/release/47185/new-patient-navigators-to-assist-every-person-diagnosed-with-dementia-to-access-the-right-care>
12. Piedmon Healthcare. Sixty Plus Older Adult | Dementia Support | Piedmont Healthcare [Internet]. Piedmon Healthcare. [cited 2021 Sep 14]. Available from: <https://www.piedmont.org/sixty-plus/sixty-plus-dementia-support>
13. Russell L. Care navigation program supports area dementia patients, caregivers [Internet]. *West Newsmagazine*. 2020 [cited 2021 Sep 14]. Available from: <https://westnewsmagazine.com/2020/11/02/129414/care-navigation-program-supports-area-dementia-patients-caregivers>

Anthonisen G, Luke A, MacNeill L, MacNeill AL, Goudreau A, Doucet S. Patient navigation programs for people with dementia, their caregivers, and members of the care team: a scoping review. *JBI Evid Synth*. 2023;21(2). Supplemental Digital Content 1.

14. Strudwick R, Tyrell K, Tocca A, Marshall J, Page A, Barber S. P-181 Dementia together – a local service evaluation. In: Poster Presentations [Internet]. British Medical Journal Publishing Group; 2019 [cited 2021 Sep 15]. p. A77.2-A77. Available from: <https://spcare.bmj.com/lookup/doi/10.1136/bmjspcare-2019-HUKNC.203>

**Reason for exclusion: Ineligible language (n = 3)**

1. Eloniemi-Sulkava U, Notkola I-L, Hentinen M, Kivelä S-L, Sivenius J, Sulkava R. Unterstützende Intervention bei dementen Patienten und ihren pflegenden Angehörigen in der Gemeinde: Eine randomisierte Untersuchung. Zeitschrift für Gerontopsychologie & -psychiatrie. 2004 Jan;17(1):31–40.
2. Eloniemi-Sulkava U, Rahkonen T. A dementia co-ordinator supports home care of dementia patients. Sairaanhoitaja. 2004;77(4):17–9.
3. Reichert M, Hampel S, Reuter V. Mobile Demenzberatung als niedrigschwelliges Hilfeangebot für pflegende Angehörige. Z Gerontol Geriat. 2016 Apr;49(3):181–6.

**Reason for exclusion: Ineligible publication date (n = 1)**

1. Cleland E. Dementia: a community care perspective. Aust J Adv Nurs. 1986 Dec 1;4(2):4–19.
